# Supplementary material
Source: publisher figshare collection journal article supplement (https://acs.figshare.com/ndownloader/files/3937381)
Supplement: Supplementary file 1 [file 3937381]

## Sheet: RSTATs
	Twin->Erf									LLS->Erf									NTR->LLS
	RSD	Correl	median(abs delta)/median	MADdup	rstd	rmean(1)	median(2)	rRSD(1)	RSD(2)	RSD	Correl	median(abs delta)/median	MADdup	rstd	rmean(1)	median(2)	rRSD(1)	RSD(2)	RSD	Correl	median(abs delta)/median	MADdup	rstd	rmean(1)	median(2)	rRSD(1)	RSD(2)
CE(18:2)	0.175734	0.473242	0.115219	0.0576097	0.0854109	0.807825	0.807825	0.10573	0.10573	0.202105	0.456547	0.106505	0.0532526	0.0789513	0.794822	0.794822	0.0993321	0.0993321	0.162937	0.680693	0.106212	0.0531061	0.078734	0.807514	0.807514	0.0975017	0.0975017
LPC(14:0)	0.127205	0.896024	0.0133085	0.00665427	0.00986548	0.124301	0.124301	0.0793674	0.0793674	0.205338	0.657825	0.0150674	0.00753371	0.0111693	0.145386	0.145386	0.0768253	0.0768253	0.212858	0.719134	0.0129127	0.00645634	0.00957205	0.135981	0.135981	0.0703926	0.0703926
LPC(16:0)	0.108744	0.735284	0.933428	0.466714	0.69194	10.668	10.668	0.0648613	0.0648613	0.110621	0.632914	0.978349	0.489175	0.72524	10.6227	10.6227	0.0682728	0.0682728	0.110973	0.748354	1.0569	0.52845	0.783469	10.1563	10.1563	0.0771413	0.0771413
LPC(16:1)	0.111829	0.830564	0.0195263	0.00976313	0.0144746	0.222961	0.222961	0.06492	0.06492	0.146384	0.724256	0.0219191	0.0109595	0.0162484	0.234928	0.234928	0.0691632	0.0691632	0.139683	0.785085	0.0193612	0.00968058	0.0143522	0.220683	0.220683	0.0650356	0.0650356
LPC(18:0)	0.118538	0.808151	0.302044	0.151022	0.223902	3.44339	3.44339	0.0650239	0.0650239	0.104558	0.732058	0.327355	0.163678	0.242665	3.45061	3.45061	0.0703253	0.0703253	0.103581	0.782369	0.325598	0.162799	0.241362	3.36265	3.36265	0.0717773	0.0717773
LPC(18:1)	0.126449	0.74987	0.143096	0.0715478	0.106075	1.66838	1.66838	0.06358	0.06358	0.103057	0.788689	0.160029	0.0800146	0.118628	1.74372	1.74372	0.0680316	0.0680316	0.0953503	0.840943	0.144836	0.072418	0.107365	1.62046	1.62046	0.0662563	0.0662563
LPC(18:2)	0.124593	0.905097	0.177358	0.0886791	0.131474	2.09279	2.09279	0.0628222	0.0628222	0.154162	0.804849	0.204099	0.102049	0.151296	2.30391	2.30391	0.0656694	0.0656694	0.154219	0.801044	0.169264	0.0846319	0.125474	2.20403	2.20403	0.0569291	0.0569291
LPC(20:4)	0.1341	0.836779	0.0317381	0.015869	0.0235271	0.387455	0.387455	0.0607222	0.0607222	0.120335	0.817872	0.0382999	0.0191499	0.0283913	0.4762	0.4762	0.0596205	0.0596205	0.116014	0.841585	0.0405937	0.0202968	0.0300917	0.461617	0.461617	0.0651875	0.0651875
LPC(22:6)	0.155783	0.841858	0.00796392	0.00398196	0.00590357	0.0882975	0.0882975	0.0668601	0.0668601	0.134505	0.902511	0.0113528	0.00567638	0.00841568	0.121956	0.121956	0.0690057	0.0690057	0.139728	0.876689	0.00844821	0.00422411	0.00626257	0.116788	0.116788	0.0536233	0.0536233
LPC(O-16:1)	0.116959	0.877936	0.011914	0.00595702	0.00883175	0.115383	0.115383	0.0765427	0.0765427	0.122705	0.617886	0.00676622	0.00338311	0.00501573	0.0598884	0.0598884	0.0837512	0.0837512	0.116245	0.706246	0.00635864	0.00317932	0.00471359	0.0590648	0.0590648	0.0798038	0.0798038
PC(32:0)	0.110212	0.797086	0.0614811	0.0307406	0.0455753	0.658623	0.658623	0.0691979	0.0691979	0.0942718	0.741258	0.0484984	0.0242492	0.0359513	0.66172	0.66172	0.0543301	0.0543301	0.0824979	0.786905	0.0458544	0.0229272	0.0339914	0.653279	0.653279	0.052032	0.052032
PC(32:1)	0.210561	0.847283	0.0681784	0.0340892	0.0505399	0.707476	0.707476	0.071437	0.071437	0.155738	0.900114	0.0459138	0.0229569	0.0340354	0.71189	0.71189	0.04781	0.04781	0.11424	0.939891	0.0600214	0.0300107	0.0444933	0.691439	0.691439	0.0643488	0.0643488
PC(32:2)	0.12789	0.92571	0.0132862	0.00664309	0.00984891	0.156782	0.156782	0.0628192	0.0628192	0.113196	0.862378	0.0131091	0.00655455	0.00971765	0.170594	0.170594	0.0569634	0.0569634	0.0914112	0.903236	0.0122117	0.00610585	0.00905241	0.169693	0.169693	0.0533457	0.0533457
PC(34:1)	0.112311	0.781699	0.927019	0.463509	0.68719	11.0732	11.0732	0.0620585	0.0620585	0.0892761	0.81958	0.797219	0.39861	0.590971	11.3677	11.3677	0.051987	0.051987	0.0828315	0.838182	0.77425	0.387125	0.573944	11.1906	11.1906	0.051288	0.051288
PC(34:2)	0.074515	0.82278	1.16509	0.582547	0.863672	20.1074	20.1074	0.0429529	0.0429529	0.0836	0.644695	1.27081	0.635404	0.942037	20.8091	20.8091	0.0452705	0.0452705	0.0767822	0.716446	1.14804	0.574022	0.851033	20.9913	20.9913	0.0405422	0.0405422
PC(34:3)	0.130202	0.869977	0.0516143	0.0258071	0.0382611	0.57927	0.57927	0.0660506	0.0660506	0.10103	0.851817	0.0526589	0.0263294	0.0390355	0.707092	0.707092	0.0552057	0.0552057	0.0929245	0.877814	0.0562255	0.0281128	0.0416794	0.720662	0.720662	0.0578349	0.0578349
PC(34:4)	0.163279	0.901158	0.00430113	0.00215056	0.00318838	0.0301104	0.0301104	0.10589	0.10589	0.123216	0.890499	0.00369711	0.00184856	0.00274063	0.0500513	0.0500513	0.0547565	0.0547565	0.107737	0.922255	0.00426527	0.00213263	0.0031618	0.0480932	0.0480932	0.0657432	0.0657432
PC(36:1)	0.135435	0.82656	0.161228	0.0806142	0.119517	1.87566	1.87566	0.0637198	0.0637198	0.0954271	0.895629	0.168265	0.0841327	0.124733	2.18026	2.18026	0.0572102	0.0572102	0.0917458	0.890757	0.151729	0.0758643	0.112475	2.10845	2.10845	0.0533448	0.0533448
PC(36:2)	0.0961298	0.798215	0.937247	0.468624	0.694772	11.8727	11.8727	0.0585186	0.0585186	0.083485	0.783437	0.908149	0.454074	0.673201	13.2509	13.2509	0.050804	0.050804	0.0856614	0.767195	0.989955	0.494978	0.733844	13.2323	13.2323	0.0554585	0.0554585
PC(36:3)	0.128098	0.792035	0.695027	0.347513	0.515216	6.64659	6.64659	0.0775159	0.0775159	0.093297	0.783527	0.653498	0.326749	0.484432	8.03262	8.03262	0.0603081	0.0603081	0.101145	0.745058	0.657843	0.328921	0.487652	8.1134	8.1134	0.0601045	0.0601045
PC(36:4)	0.120757	0.840853	0.650369	0.325184	0.482112	6.9056	6.9056	0.0698146	0.0698146	0.099723	0.803558	0.859876	0.429938	0.637418	10.0347	10.0347	0.0635214	0.0635214	0.093636	0.836227	0.889269	0.444635	0.659206	10.0622	10.0622	0.0655134	0.0655134
PC(38:3)	0.152292	0.858038	0.133636	0.066818	0.099063	1.38895	1.38895	0.0713223	0.0713223	0.103495	0.913712	0.148682	0.0743412	0.110217	2.00112	2.00112	0.0550775	0.0550775	0.0973371	0.916784	0.150584	0.075292	0.111626	2.03482	2.03482	0.054858	0.054858
PC(38:4)	0.138726	0.813827	0.384952	0.192476	0.285361	3.77788	3.77788	0.0755346	0.0755346	0.0977443	0.864192	0.5292	0.2646	0.39229	5.94525	5.94525	0.0659838	0.0659838	0.104535	0.840348	0.56174	0.28087	0.416412	5.97252	5.97252	0.0697214	0.0697214
PC(38:6)	0.179699	0.876292	0.173953	0.0869767	0.12895	1.70017	1.70017	0.0758452	0.0758452	0.106164	0.922494	0.3085	0.15425	0.228688	3.91159	3.91159	0.0584641	0.0584641	0.102054	0.92479	0.298857	0.149429	0.22154	3.83267	3.83267	0.057803	0.057803
PC(40:4)	0.18464	0.824155	0.00868663	0.00434331	0.00643931	0.0604885	0.0604885	0.106455	0.106455	0.134091	0.904045	0.0106424	0.00532121	0.00788912	0.105228	0.105228	0.0749715	0.0749715	0.11016	0.932984	0.00961591	0.00480796	0.00712818	0.105345	0.105345	0.0676649	0.0676649
PC(40:6)	0.197127	0.874266	0.0475875	0.0237937	0.0352761	0.501565	0.501565	0.0703321	0.0703321	0.114114	0.923926	0.101749	0.0508747	0.0754257	1.28049	1.28049	0.0589038	0.0589038	0.116352	0.915803	0.108759	0.0543794	0.0806218	1.24723	1.24723	0.0646408	0.0646408
PC(O-34:1)	0.111332	0.7743	0.0243073	0.0121536	0.0180187	0.261043	0.261043	0.069026	0.069026	0.0918696	0.796892	0.0160293	0.00801464	0.0118823	0.232839	0.232839	0.0510325	0.0510325	0.1045	0.726455	0.0189924	0.00949618	0.0140788	0.232954	0.232954	0.0604362	0.0604362
PC(O-34:2)	0.138776	0.816167	0.0344677	0.0172339	0.0255506	0.25823	0.25823	0.0989449	0.0989449	0.239074	0.401626	0.0507917	0.0253958	0.0376514	0.248726	0.248726	0.151377	0.151377	0.169506	0.482099	0.0388546	0.0194273	0.0288025	0.252513	0.252513	0.114064	0.114064
PC(O-34:3)	0.119872	0.845262	0.0281323	0.0140661	0.0208542	0.324498	0.324498	0.0642658	0.0642658	0.0878947	0.908398	0.0275799	0.0137899	0.0204447	0.346745	0.346745	0.0589617	0.0589617	0.0956745	0.869785	0.0248793	0.0124397	0.0184428	0.346782	0.346782	0.0531826	0.0531826
PC(O-36:2)	0.132341	0.741872	0.0105291	0.00526454	0.0078051	0.106112	0.106112	0.0735554	0.0735554	0.139955	0.780128	0.00971164	0.00485582	0.00719914	0.0982022	0.0982022	0.0733093	0.0733093	0.139638	0.777538	0.0119387	0.00596935	0.00885004	0.0996072	0.0996072	0.0888494	0.0888494
PC(O-36:3)	0.159663	0.730288	0.0133014	0.00665071	0.0098602	0.0847779	0.0847779	0.116306	0.116306	0.207453	0.491836	0.0183994	0.00919968	0.0136393	0.0926757	0.0926757	0.147172	0.147172	0.196783	0.515366	0.017323	0.0086615	0.0128414	0.091897	0.091897	0.139736	0.139736
PC(O-36:4)	0.148997	0.78807	0.0424419	0.0212209	0.0314617	0.404569	0.404569	0.0777661	0.0777661	0.10633	0.815871	0.0501916	0.0250958	0.0372065	0.582678	0.582678	0.0638543	0.0638543	0.100903	0.826045	0.0473982	0.0236991	0.0351358	0.573835	0.573835	0.0612299	0.0612299
PC(O-36:5)	0.155058	0.808641	0.046292	0.023146	0.0343158	0.428086	0.428086	0.080161	0.080161	0.100506	0.82679	0.0610813	0.0305407	0.045279	0.69152	0.69152	0.0654774	0.0654774	0.0994978	0.786018	0.0539535	0.0269768	0.0399952	0.700306	0.700306	0.057111	0.057111
PC(O-38:4)	0.149169	0.744228	0.0165615	0.00828077	0.0122769	0.179596	0.179596	0.0683586	0.0683586	0.094755	0.835291	0.0206715	0.0103357	0.0153236	0.253623	0.253623	0.0604187	0.0604187	0.107648	0.778709	0.0217105	0.0108553	0.0160938	0.254049	0.254049	0.0633492	0.0633492
PC(O-38:5)	0.152599	0.771904	0.0326364	0.0163182	0.0241931	0.343062	0.343062	0.0705209	0.0705209	0.116246	0.715856	0.059014	0.029507	0.0437465	0.524772	0.524772	0.0833628	0.0833628	0.122624	0.688845	0.0571345	0.0285673	0.0423532	0.528986	0.528986	0.080065	0.080065
PE(34:2)	0.177313	0.925414	0.0354924	0.0177462	0.0263101	0.263913	0.263913	0.0996926	0.0996926	0.232222	0.756005	0.0779214	0.0389607	0.0577624	0.439989	0.439989	0.131281	0.131281	0.183718	0.787616	0.0807172	0.0403586	0.0598349	0.424347	0.424347	0.141004	0.141004
PE(38:2)	0.157023	0.7553	0.410605	0.205303	0.304378	3.81321	3.81321	0.0798219	0.0798219	0.136345	0.778039	0.499282	0.249641	0.370113	4.51353	4.51353	0.0820006	0.0820006	0.12387	0.771581	0.46431	0.232155	0.344188	4.43566	4.43566	0.0775958	0.0775958
PE(O-36:5)	0.204459	0.76185	0.0195563	0.00977817	0.0144969	0.11881	0.11881	0.122018	0.122018	0.1355	0.802773	0.0265871	0.0132936	0.0197088	0.217004	0.217004	0.090822	0.090822	0.124923	0.824739	0.0251279	0.0125639	0.018627	0.216317	0.216317	0.0861099	0.0861099
SM(d18:1/14:0)	0.126195	0.810496	0.0243527	0.0121763	0.0180524	0.277129	0.277129	0.0651407	0.0651407	0.0928918	0.869079	0.0234499	0.0117249	0.0173832	0.323116	0.323116	0.0537985	0.0537985	0.0933206	0.850145	0.0243642	0.0121821	0.0180609	0.320171	0.320171	0.0564103	0.0564103
SM(d18:1/15:0)	0.145923	0.769139	0.0139427	0.00697133	0.0103355	0.15244	0.15244	0.0678009	0.0678009	0.0869449	0.883615	0.0124057	0.00620287	0.00919625	0.171775	0.171775	0.0535365	0.0535365	0.0924076	0.87184	0.0121466	0.00607332	0.00900418	0.171064	0.171064	0.0526363	0.0526363
SM(d18:1/16:0)	0.113176	0.699382	0.302092	0.151046	0.223938	3.5827	3.5827	0.0625054	0.0625054	0.0842406	0.729309	0.288875	0.144437	0.21414	3.79066	3.79066	0.0564916	0.0564916	0.08988	0.725533	0.283082	0.141541	0.209846	3.74463	3.74463	0.056039	0.056039
SM(d18:1/16:1)	0.112609	0.776729	0.0386561	0.019328	0.0286554	0.423523	0.423523	0.0676595	0.0676595	0.090111	0.802517	0.033572	0.016786	0.0248866	0.453756	0.453756	0.0548457	0.0548457	0.0987931	0.770119	0.0355131	0.0177565	0.0263255	0.452195	0.452195	0.0582171	0.0582171
SM(d18:1/17:0)	0.18309	0.750883	0.00702135	0.00351068	0.00520486	0.0653936	0.0653936	0.0795928	0.0795928	0.11452	0.853185	0.00667051	0.00333525	0.00494478	0.0698874	0.0698874	0.0707536	0.0707536	0.126053	0.82907	0.00742034	0.00371017	0.00550063	0.0698269	0.0698269	0.0787751	0.0787751
SM(d18:1/18:1)	0.116133	0.829554	0.0263128	0.0131564	0.0195054	0.286055	0.286055	0.0681877	0.0681877	0.0988719	0.870165	0.0232954	0.0116477	0.0172687	0.306614	0.306614	0.0563206	0.0563206	0.111332	0.834497	0.0264232	0.0132116	0.0195873	0.308555	0.308555	0.0634807	0.0634807
SM(d18:1/18:2)	0.119566	0.803647	0.00563286	0.00281643	0.00417558	0.0552133	0.0552133	0.0756263	0.0756263	0.200143	0.306152	0.0116412	0.00582059	0.00862949	0.0553242	0.0553242	0.15598	0.15598	0.200713	0.322942	0.0108788	0.00543942	0.00806438	0.0550834	0.0550834	0.146403	0.146403
SM(d18:1/20:1)	0.110559	0.829153	0.0175764	0.00878822	0.0130292	0.184398	0.184398	0.0706581	0.0706581	0.0889988	0.859783	0.0146236	0.00731178	0.0108403	0.195275	0.195275	0.0555131	0.0555131	0.107023	0.798396	0.0146619	0.00733093	0.0108687	0.196973	0.196973	0.0551787	0.0551787
SM(d18:1/21:0)	0.120961	0.84609	0.0157958	0.00789792	0.0117093	0.18188	0.18188	0.0643794	0.0643794	0.0838212	0.909737	0.0126843	0.00634217	0.00940278	0.19894	0.19894	0.0472643	0.0472643	0.0950915	0.881723	0.013326	0.00666299	0.00987841	0.201116	0.201116	0.0491179	0.0491179
SM(d18:1/22:0)	0.111239	0.811943	0.0987837	0.0493919	0.0732274	1.18284	1.18284	0.0619079	0.0619079	0.102396	0.770085	0.0904533	0.0452267	0.0670521	1.22319	1.22319	0.0548174	0.0548174	0.102688	0.764474	0.0960452	0.0480226	0.0711973	1.2197	1.2197	0.0583726	0.0583726
SM(d18:1/22:1)	0.110462	0.808142	0.0732919	0.0366459	0.0543305	0.808559	0.808559	0.0671943	0.0671943	0.117772	0.738968	0.0887562	0.0443781	0.0657941	0.84733	0.84733	0.0776487	0.0776487	0.125438	0.693067	0.0801896	0.0400948	0.0594437	0.852457	0.852457	0.0697323	0.0697323
SM(d18:1/23:0)	0.109346	0.834291	0.0338911	0.0169456	0.0251232	0.435495	0.435495	0.0576887	0.0576887	0.0948272	0.813827	0.0364498	0.0182249	0.0270199	0.466745	0.466745	0.05789	0.05789	0.0904742	0.820388	0.0320453	0.0160226	0.0237548	0.46686	0.46686	0.0508821	0.0508821
SM(d18:1/23:1)	0.120023	0.80748	0.0334209	0.0167105	0.0247746	0.342254	0.342254	0.0723866	0.0723866	0.088033	0.872783	0.0249605	0.0124803	0.018503	0.357389	0.357389	0.0517727	0.0517727	0.101567	0.833111	0.0283343	0.0141671	0.0210039	0.349738	0.349738	0.0600562	0.0600562
SM(d18:1/24:0)	0.108429	0.834099	0.061937	0.0309685	0.0459133	0.738473	0.738473	0.0621733	0.0621733	0.100371	0.834852	0.0576371	0.0288185	0.0427258	0.762003	0.762003	0.0560703	0.0560703	0.108015	0.807288	0.0568024	0.0284012	0.042107	0.771088	0.771088	0.0546073	0.0546073
SM(d18:1/24:1)	0.10608	0.803316	0.1735	0.0867498	0.128614	2.05263	2.05263	0.062658	0.062658	0.112257	0.73238	0.154457	0.0772283	0.114497	2.06387	2.06387	0.055477	0.055477	0.118062	0.71914	0.166111	0.0830554	0.123136	2.03657	2.03657	0.0604625	0.0604625
SM(d18:1/24:2)	0.107347	0.829708	0.0832701	0.041635	0.0617273	0.94103	0.94103	0.0655954	0.0655954	0.0974575	0.82842	0.0721921	0.0360961	0.0535153	0.918037	0.918037	0.0582932	0.0582932	0.107238	0.796339	0.0760013	0.0380006	0.056339	0.911295	0.911295	0.061823	0.061823
SM(d18:1/25:1)	0.101197	0.895481	0.00625649	0.00312824	0.00463787	0.0757644	0.0757644	0.0612144	0.0612144	0.125635	0.766491	0.00673408	0.00336704	0.0049919	0.0819619	0.0819619	0.0609052	0.0609052	0.124401	0.819145	0.00598749	0.00299375	0.00443847	0.0812902	0.0812902	0.0546003	0.0546003
TG(48:1)	0.569007	0.669973	0.215396	0.107698	0.159671	1.10593	1.10593	0.144377	0.144377	0.504443	0.675652	0.274916	0.137458	0.203792	2.55276	2.55276	0.0798321	0.0798321	0.251049	0.905402	0.389235	0.194618	0.288536	2.30934	2.30934	0.124943	0.124943
TG(50:1)	0.358095	0.767024	0.502709	0.251355	0.372653	4.20555	4.20555	0.0886098	0.0886098	0.325921	0.736237	0.929051	0.464525	0.688696	7.75831	7.75831	0.0887688	0.0887688	0.158032	0.925182	0.927353	0.463677	0.687438	7.2572	7.2572	0.0947249	0.0947249
TG(50:2)	0.334988	0.7851	0.524806	0.262403	0.389034	5.41729	5.41729	0.0718133	0.0718133	0.308177	0.742405	0.806567	0.403284	0.5979	8.23659	8.23659	0.0725907	0.0725907	0.169981	0.909092	0.813719	0.40686	0.603202	7.71755	7.71755	0.0781598	0.0781598
TG(50:3)	0.400844	0.793466	0.236378	0.118189	0.175225	1.84745	1.84745	0.0948467	0.0948467	0.1912	0.899224	0.329981	0.16499	0.244611	3.08865	3.08865	0.0791968	0.0791968	0.192969	0.908623	0.319604	0.159802	0.236919	3.05652	3.05652	0.0775129	0.0775129
TG(50:4)	0.443566	0.821934	0.0326024	0.0163012	0.0241678	0.264189	0.264189	0.0914792	0.0914792	0.365369	0.769239	0.0832395	0.0416197	0.0617046	0.62725	0.62725	0.0983732	0.0983732	0.225953	0.878638	0.0785401	0.03927	0.058221	0.642265	0.642265	0.0906494	0.0906494
TG(51:4)	0.399164	0.756175	0.0105483	0.00527415	0.00781935	0.0627527	0.0627527	0.124606	0.124606	0.253956	0.836868	0.0156912	0.00784561	0.0116317	0.125313	0.125313	0.0928217	0.0928217	0.252219	0.826812	0.0174994	0.00874968	0.0129721	0.12308	0.12308	0.105396	0.105396
TG(52:2)	0.179543	0.860576	1.53485	0.767426	1.13777	16.1952	16.1952	0.0702533	0.0702533	0.201816	0.761824	2.16599	1.083	1.60563	19.5477	19.5477	0.0821388	0.0821388	0.15036	0.844631	1.88281	0.941407	1.39571	19.5065	19.5065	0.0715512	0.0715512
TG(52:3)	0.193394	0.866606	1.20554	0.602771	0.893656	13.7206	13.7206	0.0651324	0.0651324	0.168516	0.844954	1.69098	0.84549	1.25351	16.9316	16.9316	0.0740335	0.0740335	0.174876	0.834588	1.6828	0.841401	1.24744	17.2028	17.2028	0.0725141	0.0725141
TG(52:4)	0.308093	0.872778	0.389505	0.194752	0.288736	3.44732	3.44732	0.0837567	0.0837567	0.205987	0.88432	0.710301	0.355151	0.526539	5.73794	5.73794	0.0917645	0.0917645	0.26407	0.82274	0.614535	0.307267	0.455548	5.75853	5.75853	0.0791084	0.0791084
TG(52:5)	0.469898	0.790516	0.063822	0.031911	0.0473106	0.459009	0.459009	0.103071	0.103071	0.194655	0.906112	0.148336	0.0741678	0.10996	1.16525	1.16525	0.0943654	0.0943654	0.331185	0.763293	0.149783	0.0748913	0.111032	1.15868	1.15868	0.0958269	0.0958269
TG(54:2)	0.260977	0.821771	0.217819	0.108909	0.161467	1.53535	1.53535	0.105166	0.105166	0.262006	0.759999	0.260805	0.130403	0.193332	2.28916	2.28916	0.0844556	0.0844556	0.177866	0.873483	0.221544	0.110772	0.164228	2.21912	2.21912	0.0740059	0.0740059
TG(54:3)	0.263428	0.724058	0.547089	0.273545	0.405552	4.14666	4.14666	0.097802	0.097802	0.227196	0.76511	0.643434	0.321717	0.476971	5.63033	5.63033	0.0847146	0.0847146	0.195362	0.820287	0.536719	0.268359	0.397864	5.44827	5.44827	0.0730258	0.0730258
TG(54:4)	0.268402	0.835502	0.337361	0.16868	0.250082	2.56191	2.56191	0.0976156	0.0976156	0.248141	0.808038	0.511207	0.255603	0.378953	4.70529	4.70529	0.0805375	0.0805375	0.231917	0.820696	0.437949	0.218974	0.324647	4.87409	4.87409	0.0666067	0.0666067
TG(54:5)	0.383597	0.870536	0.126032	0.0630161	0.0934264	0.972223	0.972223	0.0960956	0.0960956	0.288275	0.801902	0.312724	0.156362	0.231819	2.86808	2.86808	0.0808272	0.0808272	0.321365	0.782141	0.368109	0.184054	0.272875	2.81542	2.81542	0.0969217	0.0969217
TG(55:2)	0.193915	0.688819	0.00933126	0.00466563	0.00691716	0.079143	0.079143	0.0874009	0.0874009	0.250884	0.315422	0.0156717	0.00783586	0.0116173	0.0952183	0.0952183	0.122007	0.122007	0.182116	0.562381	0.014802	0.00740102	0.0109726	0.0915981	0.0915981	0.119791	0.119791
TG(56:4)	0.271506	0.823068	0.0216463	0.0108232	0.0160462	0.134449	0.134449	0.119348	0.119348	0.29869	0.759682	0.0371095	0.0185547	0.0275089	0.246906	0.246906	0.111414	0.111414	0.213114	0.827598	0.0378584	0.0189292	0.0280641	0.260379	0.260379	0.107782	0.107782
TG(56:5)	0.31712	0.839999	0.0323175	0.0161588	0.0239566	0.243388	0.243388	0.0984298	0.0984298	0.301582	0.719222	0.0870652	0.0435326	0.0645406	0.697166	0.697166	0.0925756	0.0925756	0.205488	0.842149	0.0945771	0.0472885	0.070109	0.72535	0.72535	0.0966555	0.0966555
TG(56:6)	0.381969	0.83965	0.0356225	0.0178113	0.0264066	0.236169	0.236169	0.111812	0.111812	0.307194	0.74234	0.108594	0.054297	0.0804996	0.911186	0.911186	0.0883459	0.0883459	0.227336	0.834891	0.10791	0.0539549	0.0799924	0.889783	0.889783	0.089901	0.089901

## Sheet: Supplementary Table
	Relative Standard Deviations (RSD)								Correlation
	QC samples			Replicate samples			Transfer samples		Transfer samples
Lipid	ERF	NTR	LLS	ERF	NTR	LLS	ERF-NTR	ERF-LLS	ERF-NTR	ERF-LLS
CE(18:2)	0.154798	0.125455	0.0931233	0.192359	0.154573	0.140127	0.175734	0.202105	0.473242	0.456547
LPC(14:0)	0.0688624	0.0727822	0.0488897	0.112194	0.112527	0.176177	0.127205	0.205338	0.896024	0.657825
LPC(16:0)	0.0552142	0.0712331	0.0131566	0.102122	0.0944416	0.0666532	0.108744	0.110621	0.735284	0.632914
LPC(16:1)	0.0592538	0.0677213	0.0167456	0.105054	0.0970065	0.115264	0.111829	0.146384	0.830564	0.724256
LPC(18:0)	0.0584259	0.0699581	0.0127164	0.107605	0.092778	0.0684222	0.118538	0.104558	0.808151	0.732058
LPC(18:1)	0.05589	0.073238	0.0152972	0.11247	0.098691	0.0686097	0.126449	0.103057	0.74987	0.788689
LPC(18:2)	0.0596612	0.068533	0.0163944	0.116886	0.119791	0.107139	0.124593	0.154162	0.905097	0.804849
LPC(20:4)	0.0594386	0.0691182	0.0166454	0.111709	0.102113	0.0985879	0.1341	0.120335	0.836779	0.817872
LPC(22:6)	0.0668007	0.0725868	0.020045	0.114977	0.112655	0.124883	0.155783	0.134505	0.841858	0.902511
LPC(O-16:1)	0.0806202	0.0777804	0.0324433	0.12246	0.110645	0.0799947	0.116959	0.122705	0.877936	0.617886
PC(32:0)	0.0559072	0.073129	0.0172966	0.0883738	0.0972483	0.0642679	0.110212	0.0942718	0.797086	0.741258
PC(32:1)	0.0537189	0.0733789	0.0193385	0.106897	0.114809	0.0890257	0.210561	0.155738	0.847283	0.900114
PC(32:2)	0.0649696	0.0680703	0.0198889	0.102444	0.107079	0.0808011	0.12789	0.113196	0.92571	0.862378
PC(34:1)	0.0418554	0.0608318	0.0166643	0.0753658	0.0828967	0.0646279	0.112311	0.0892761	0.781699	0.81958
PC(34:2)	0.0347709	0.04573	0.0174277	0.0630141	0.0655908	0.0588746	0.074515	0.0836	0.82278	0.644695
PC(34:3)	0.0576852	0.0718097	0.0188058	0.101316	0.0999742	0.0741284	0.130202	0.10103	0.869977	0.851817
PC(34:4)	0.0648696	0.0738382	0.0267849	0.101731	0.12828	0.085013	0.163279	0.123216	0.901158	0.890499
PC(36:1)	0.050908	0.0679773	0.020185	0.0946326	0.090662	0.0697725	0.135435	0.0954271	0.82656	0.895629
PC(36:2)	0.0420266	0.0620446	0.0171496	0.0736514	0.0811564	0.0637359	0.0961298	0.083485	0.798215	0.783437
PC(36:3)	0.0546187	0.0736996	0.0198124	0.0944002	0.10066	0.0774491	0.128098	0.093297	0.792035	0.783527
PC(36:4)	0.0434995	0.0677158	0.0171809	0.0818617	0.0970988	0.0784374	0.120757	0.099723	0.840853	0.803558
PC(38:3)	0.0540849	0.0713517	0.019417	0.0984482	0.104075	0.0813138	0.152292	0.103495	0.858038	0.913712
PC(38:4)	0.0488103	0.0736614	0.0191864	0.0895756	0.0999565	0.0921308	0.138726	0.0977443	0.813827	0.864192
PC(38:6)	0.0551731	0.0715417	0.0178975	0.104109	0.123951	0.0969064	0.179699	0.106164	0.876292	0.922494
PC(40:4)	0.0785067	0.0848128	0.0382424	0.129984	0.107585	0.106468	0.18464	0.134091	0.824155	0.904045
PC(40:6)	0.0564948	0.0765071	0.0177529	0.101292	0.128755	0.0966314	0.197127	0.114114	0.874266	0.923926
PC(O-34:1)	0.0599284	0.0674858	0.0303642	0.0961423	0.0917391	0.07662	0.111332	0.0918696	0.7743	0.796892
PC(O-34:2)	0.0557687	0.0930139	0.0332551	0.104444	0.119617	0.0779938	0.138776	0.239074	0.816167	0.401626
PC(O-34:3)	0.0561298	0.0724214	0.0214097	0.097593	0.0960985	0.0690204	0.119872	0.0878947	0.845262	0.908398
PC(O-36:2)	0.0721262	0.062276	0.0310965	0.11207	0.0830863	0.0965599	0.132341	0.139955	0.741872	0.780128
PC(O-36:3)	0.0816785	0.0940182	0.0283565	0.122859	0.123681	0.0804084	0.159663	0.207453	0.730288	0.491836
PC(O-36:4)	0.0763337	0.0848306	0.0207976	0.126076	0.118297	0.094537	0.148997	0.10633	0.78807	0.815871
PC(O-36:5)	0.0644164	0.0741572	0.0206293	0.106676	0.101159	0.0774593	0.155058	0.100506	0.808641	0.82679
PC(O-38:4)	0.0576614	0.0819596	0.0364539	0.10405	0.108547	0.084549	0.149169	0.094755	0.744228	0.835291
PC(O-38:5)	0.0601427	0.0787074	0.0646763	0.0968887	0.103673	0.0996267	0.152599	0.116246	0.771904	0.715856
PE(34:2)	0.089594	0.112861	0.0877472	0.160288	0.15983	0.120496	0.177313	0.232222	0.925414	0.756005
PE(38:2)	0.0692064	0.0884682	0.0391188	0.123542	0.118039	0.0929401	0.157023	0.136345	0.7553	0.778039
PE(O-36:5)	0.0930546	0.0965295	0.033292	0.129075	0.123715	0.0912826	0.204459	0.1355	0.76185	0.802773
SM(d18:1/14:0)	0.0583231	0.070538	0.0189773	0.0959253	0.105174	0.0753461	0.126195	0.0928918	0.810496	0.869079
SM(d18:1/15:0)	0.0605682	0.0716594	0.0191541	0.0975329	0.103813	0.0766004	0.145923	0.0869449	0.769139	0.883615
SM(d18:1/16:0)	0.0531933	0.0724096	0.0175612	0.0851254	0.0957628	0.063289	0.113176	0.0842406	0.699382	0.729309
SM(d18:1/16:1)	0.0580376	0.0730473	0.0188887	0.0925464	0.0957832	0.0676979	0.112609	0.090111	0.776729	0.802517
SM(d18:1/17:0)	0.0681788	0.0906781	0.0292106	0.116012	0.123907	0.0774938	0.18309	0.11452	0.750883	0.853185
SM(d18:1/18:1)	0.0566057	0.0760292	0.0218872	0.0923782	0.0996759	0.0783261	0.116133	0.0988719	0.829554	0.870165
SM(d18:1/18:2)	0.0719341	0.0937521	0.0514381	0.102955	0.131788	0.109201	0.119566	0.200143	0.803647	0.306152
SM(d18:1/20:1)	0.0554558	0.0740039	0.0224724	0.0907827	0.0955672	0.0721032	0.110559	0.0889988	0.829153	0.859783
SM(d18:1/21:0)	0.0571182	0.0725768	0.0185813	0.0923132	0.112881	0.0772565	0.120961	0.0838212	0.84609	0.909737
SM(d18:1/22:0)	0.0556593	0.0725035	0.0190326	0.0926082	0.10059	0.0727684	0.111239	0.102396	0.811943	0.770085
SM(d18:1/22:1)	0.0569998	0.0720386	0.0244044	0.0928257	0.0979301	0.0763968	0.110462	0.117772	0.808142	0.738968
SM(d18:1/23:0)	0.0606039	0.0703004	0.0182442	0.0909695	0.10184	0.0738412	0.109346	0.0948272	0.834291	0.813827
SM(d18:1/23:1)	0.0597903	0.0710421	0.0225761	0.0928898	0.100527	0.0790121	0.120023	0.088033	0.80748	0.872783
SM(d18:1/24:0)	0.0544678	0.0698703	0.0198776	0.0905436	0.102249	0.0746535	0.108429	0.100371	0.834099	0.834852
SM(d18:1/24:1)	0.0559539	0.0726955	0.0182705	0.093713	0.096361	0.0794836	0.10608	0.112257	0.803316	0.73238
SM(d18:1/24:2)	0.0553452	0.0714026	0.0187123	0.095141	0.0965782	0.0708575	0.107347	0.0974575	0.829708	0.82842
SM(d18:1/25:1)	0.0605975	0.0656441	0.0355401	0.0875489	0.102471	0.105354	0.101197	0.125635	0.895481	0.766491
TG(48:1)	0.0705294	0.0893666	0.0297386	0.189096	0.14384	0.103595	0.569007	0.504443	0.669973	0.675652
TG(50:1)	0.06363	0.0752031	0.0297212	0.157675	0.10845	0.0915304	0.358095	0.325921	0.767024	0.736237
TG(50:2)	0.0590903	0.0847457	0.0273385	0.152919	0.120512	0.115295	0.334988	0.308177	0.7851	0.742405
TG(50:3)	0.0689399	0.0883952	0.0260196	0.183874	0.142762	0.164931	0.400844	0.1912	0.793466	0.899224
TG(50:4)	0.0707006	0.0888248	0.0301544	0.196445	0.139653	0.143713	0.443566	0.365369	0.821934	0.769239
TG(51:4)	0.0896407	0.149178	0.0379519	0.166214	0.193119	0.117114	0.399164	0.253956	0.756175	0.836868
TG(52:2)	0.0534946	0.0665899	0.0268326	0.118604	0.104966	0.100385	0.179543	0.201816	0.860576	0.761824
TG(52:3)	0.0532605	0.0758281	0.0270316	0.124959	0.117257	0.0985917	0.193394	0.168516	0.866606	0.844954
TG(52:4)	0.0665744	0.0861083	0.0254474	0.159594	0.158617	0.132003	0.308093	0.205987	0.872778	0.88432
TG(52:5)	0.0677133	0.0889801	0.0282807	0.198195	0.143222	0.145013	0.469898	0.194655	0.790516	0.906112
TG(54:2)	0.0797619	0.0933687	0.0291414	0.183509	0.133427	0.14386	0.260977	0.262006	0.821771	0.759999
TG(54:3)	0.0684649	0.100321	0.0270956	0.15347	0.131219	0.104335	0.263428	0.227196	0.724058	0.76511
TG(54:4)	0.0928022	0.0883975	0.0263367	0.173786	0.144231	0.113731	0.268402	0.248141	0.835502	0.808038
TG(54:5)	0.0700737	0.0923961	0.0311527	0.178296	0.186337	0.134454	0.383597	0.288275	0.870536	0.801902
TG(55:2)	0.0925118	0.0657034	0.0456221	0.158726	0.101874	0.082394	0.193915	0.250884	0.688819	0.315422
TG(56:4)	0.0819634	0.0967989	0.0334978	0.171174	0.139925	0.128005	0.271506	0.29869	0.823068	0.759682
TG(56:5)	0.0736384	0.0974993	0.0323819	0.157014	0.148373	0.148724	0.31712	0.301582	0.839999	0.719222
TG(56:6)	0.0744427	0.102435	0.0294609	0.163576	0.159512	0.137445	0.381969	0.307194	0.83965	0.74234

## Sheet: Supplementary Transfer Graphs
Plots of Transfer samples measured in the ERF study versus corrected responses of the same samples measured in the original studies.
All lipids have single study relative standard deviations on both QCs and on replicates < 20%
									0.202105
									0.205338
									0.110621
									0.146384
									0.104558
									0.103057
									0.154162
									0.120335
									0.134505
									0.122705
									0.0942718
									0.155738
									0.113196
									0.0892761
									0.0836
									0.10103
									0.123216
									0.0954271
									0.083485
									0.093297
									0.099723
									0.103495
									0.0977443
									0.106164
									0.134091
									0.114114
									0.0918696
									0.239074
									0.0878947
									0.139955
									0.207453
									0.10633
									0.100506
									0.094755
									0.116246
									0.232222
									0.136345
									0.1355
									0.0928918
									0.0869449
									0.0842406
									0.090111
									0.11452
									0.0988719
									0.200143
									0.0889988
									0.0838212
									0.102396
									0.117772
									0.0948272
									0.088033
									0.100371
									0.112257
									0.0974575
									0.125635
									0.504443
									0.325921
									0.308177
									0.1912
									0.365369
									0.253956
									0.201816
									0.168516
									0.205987
									0.194655
									0.262006
									0.227196
									0.248141
									0.288275
									0.250884
									0.29869
									0.301582
									0.307194
